# Supplementary material for: Genome-wide RNAi screening identifies TMIGD3 isoform1 as a suppressor of NF-κB and osteosarcoma progression
Source: PubMed Central journal article supplement (PMC5133659; doi:10.1038/ncomms13561), 2016-11-25
Supplement: ncomms13561-s1.pdf [file ncomms13561-s1.pdf]

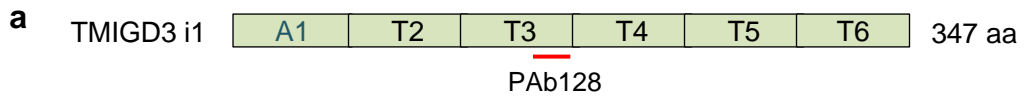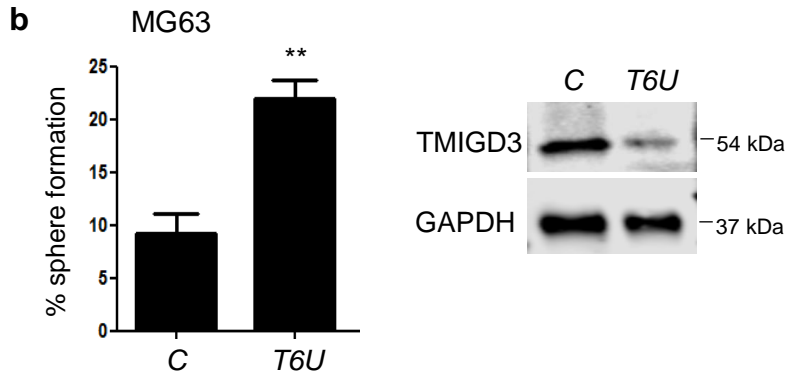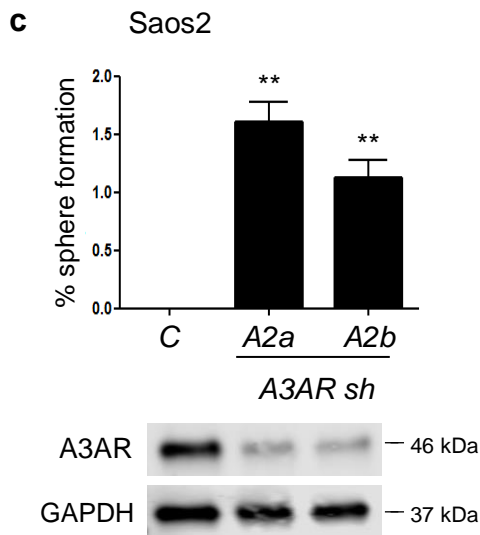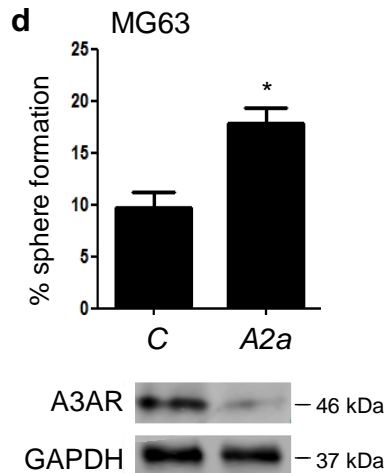

**Supplementary Figure 1 | Knockdown of TMIGD3 or A3AR increases sphere formation in multiple OS cells.**  
**(a)** TMIGD3 i1 protein and location of the TMIGD3-specific antibody (PAb128, red bar). **(b)** Sphere formation assays using MG63 cells infected with lentiviral vectors encoding non-silencing *control* (C) or *TMIGD3* (T6U) shRNAs (left). Error bars: means  $\pm$  S.D. (n=3 independent experiments). \*\* p<0.01; Student's t-test (two-tailed). Representative images of western blotting for TMIGD3 and GAPDH (right). **(c, d)** Sphere formation assays using Saos2 **(c)** and MG63 **(d)** cells downregulated for A3AR (A2a, A2b). Graphs show percentage of sphere formation. Representative images of western blotting for A3AR and GAPDH are present below the graph. Error bars: means  $\pm$  S.D. (n=3 independent experiments). \* p<0.05, \*\* p<0.01; Student's t-test (two-tailed).

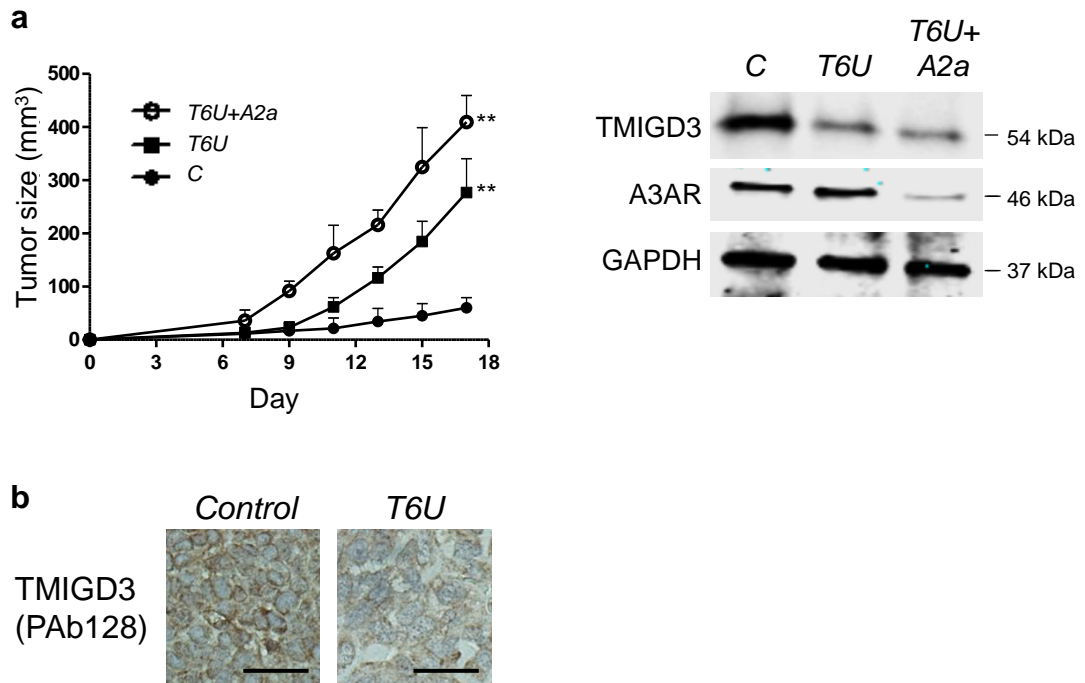

**Supplementary Figure 2 | Downregulation of TMIGD3 and A3AR is associated with OS malignancy *in vivo* and clinically.**

(a) Tumor growth of SJSA-1 cells downregulated for TMIGD3 alone (*T6U*), or in combination with A3AR (*T6U+A2a*). Cells ( $1 \times 10^6$ ) were subcutaneously injected into nude mice, and sizes of tumors were measured twice a week for 17 days. Error bars: means  $\pm$  S.D. ( $n=5$  mice per group). \*\*  $p < 0.01$ ; Two-way ANOVA. Representative images of western blotting for TMIGD3, A3AR, and GAPDH (right). (b) IHC for TMIGD3 with PAb128 using SJSA-1-derived tumors infected with lentiviral vectors encoding non-silencing (*control*) or *TMIGD3* (*T6U*) shRNAs. Scale bar: 100  $\mu$ m.

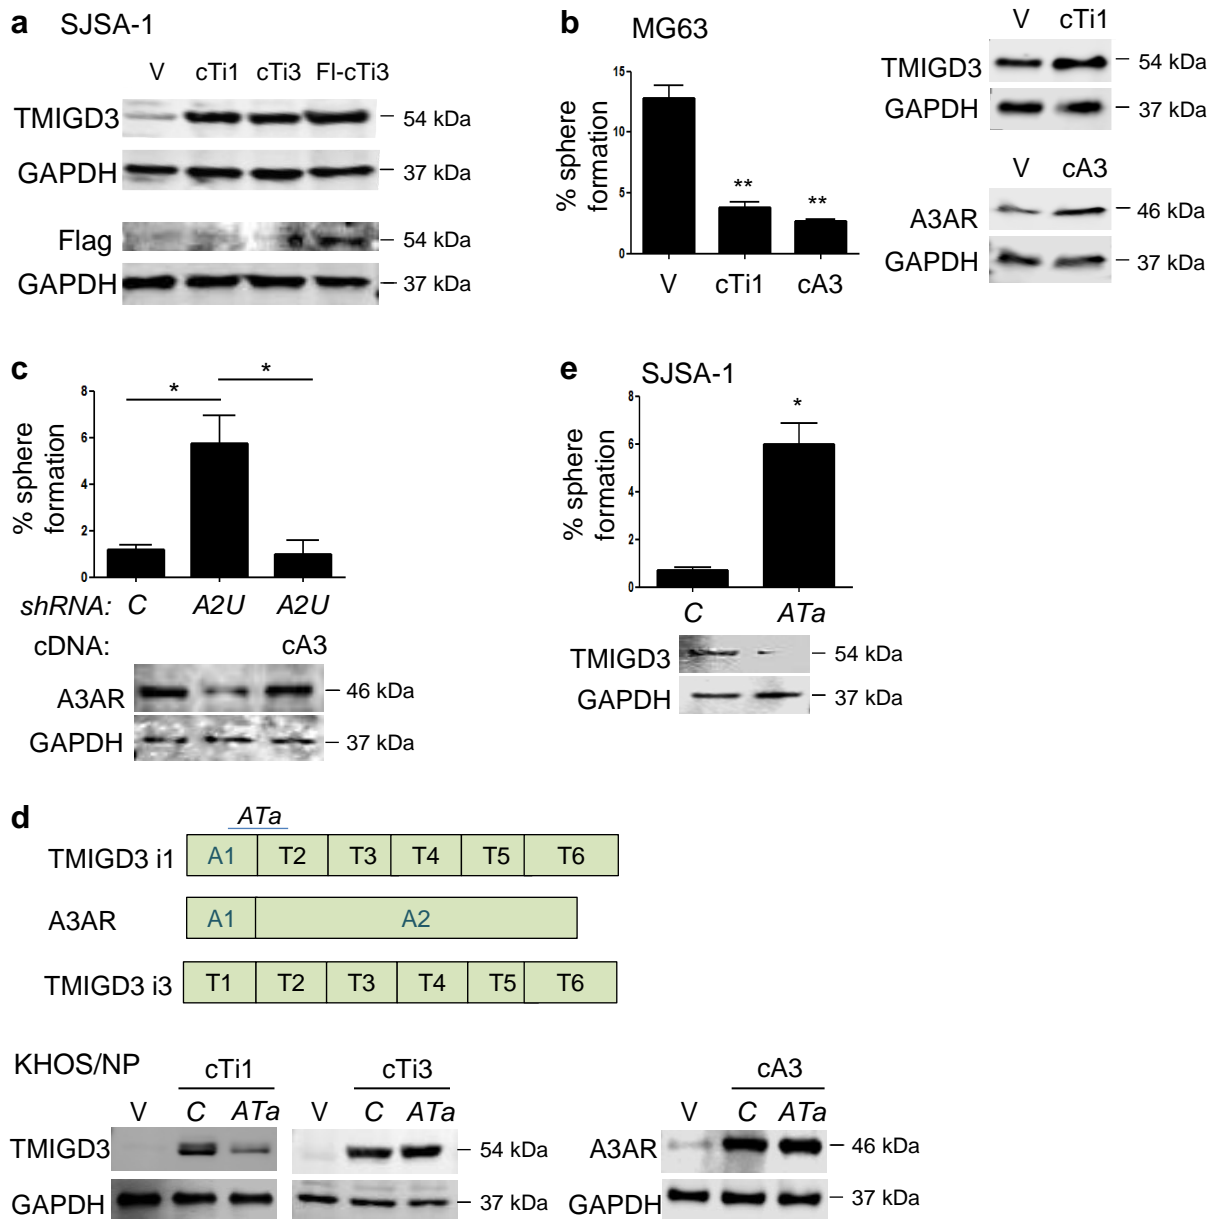

### Supplementary Figure 3 | Manipulation of TMIGD3 and A3AR expression and its effects on sphere formation.

(a) TMIGD3 i1 and i3 run at a similar size. Representative images of western blotting using SJSa-1 cells expressing vector control (V), TMIGD3 i1 (cTi1), TMIGD3 i3 (cTi3), or Flag-tagged cTi3 (FI-cTi3) for indicated proteins. (b, c) Sphere formation assays using MG63 cells overexpressing vector control (V), TMIGD3 i1 (cTi1), or A3AR (cA3, b) and SJSa-1 cells following knockdown of A3AR with a shRNA targeting the 3' UTR (A2U) and concomitant overexpression of A3AR (A2U + cA3) (c). Graph showing % of sphere formation. Representative images of western blotting for TMIGD3, A3AR, and GAPDH. Error bars: means  $\pm$  S.D. (n=3 independent experiments). \* p<0.05, \*\* p<0.01; Student's t-test (two-tailed). (d) Design of the ATa siRNA that targets only TMIGD3 i1 with minimal effects on TMIGD3 i3 and A3AR. Immunoblots for TMIGD3 and A3AR using KHOS/NP cells overexpressing TMIGD3 i1 (cTi1), TMIGD3 i3 (cTi3), or A3AR (cA3) following transfection of control or ATa siRNAs. (e) Sphere formation assays using SJSa-1 cells following transfection of the ATa siRNA. Representative immunoblots showing knockdown of TMIGD3 (below). Error bars: means  $\pm$  S.D. (n=3 independent experiments). \* p<0.05; Student's t-test (two-tailed).

### TMIGD3 i1

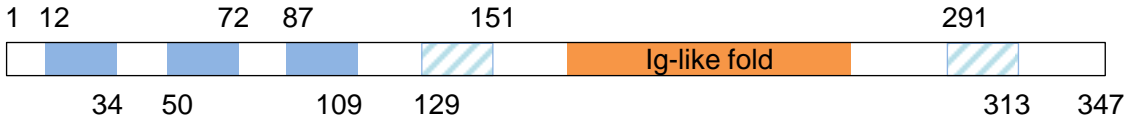

### A3AR

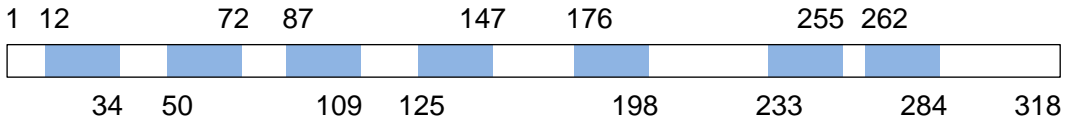

### Supplementary Figure 4 | Predicted structure of TMIGD3 i1 and its comparison with A3AR.

Blue filled boxes indicate reported transmembrane helices. Blue boxes with oblique lines indicate predicted transmembrane helices. Three N-terminal transmembrane helices are common between TMIGD3 i1 and A3AR. Orange box indicates the Ig-like fold. Numbers indicate amino acid locations.

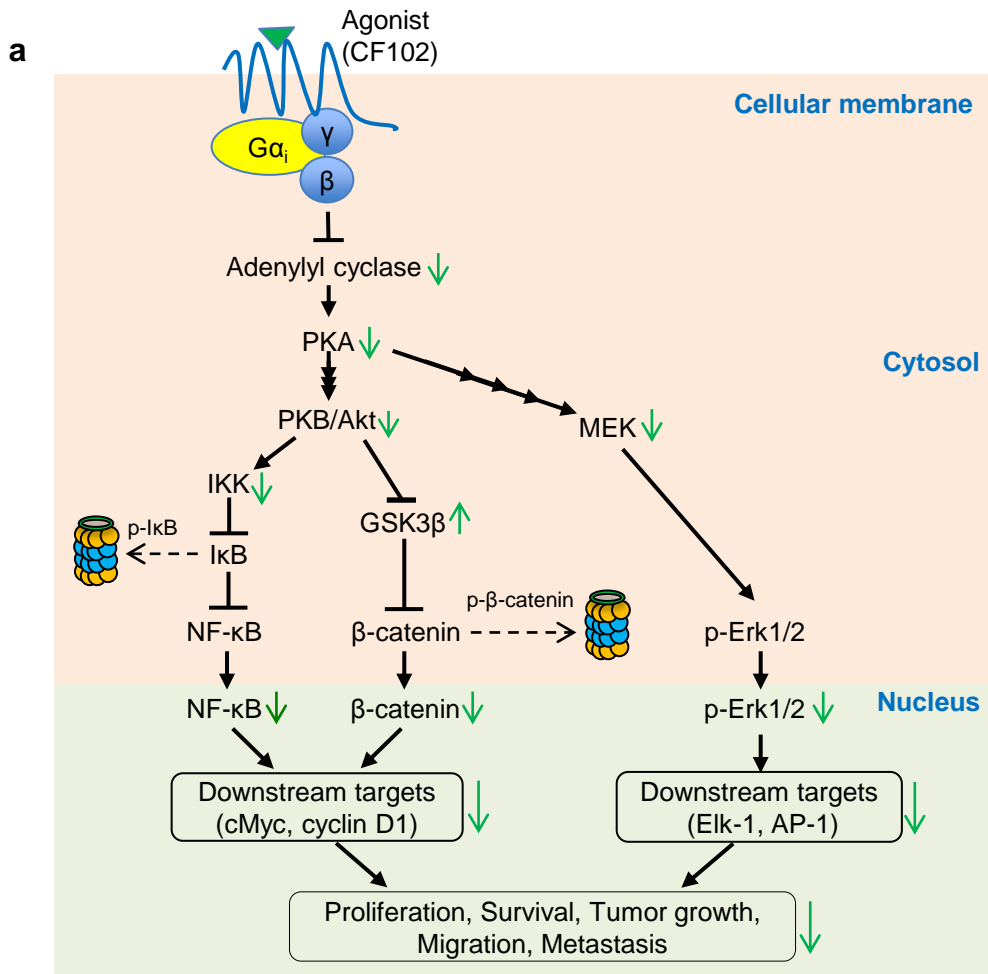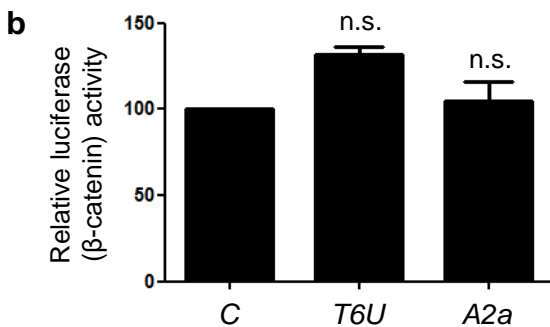

**Supplementary Figure 5 | Signaling pathways regulated by A3AR and effects of knockdown of TMIGD3 or A3AR on the  $\beta$ -catenin activity.**

(a) Cancer associated-signaling pathways regulated by A3AR. (b) TOPFlash luciferase reporter assays for measuring the  $\beta$ -catenin activity in SJSA-1 cells downregulated for TMIGD3 (*T6U*) or A3AR (*A2a*). Graph showing relative luciferase activity normalized to that of SJSA-1 cells infected with non-silencing *control* (*C*) lentiviral vector. Error bars: means  $\pm$  S.D. ( $n=3$  independent experiments). n.s.: not significant; Student's t-test (two-tailed).

**a** SJSA-1

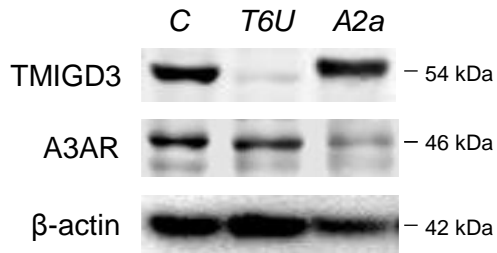

**b** Saos2

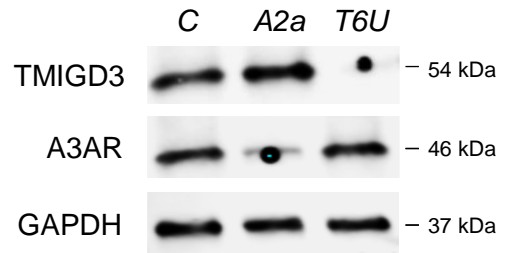

**Supplementary Figure 6 | Knockdown of TMIGD3 (*T6U*) or A3AR (*A2a*) does not alter protein levels of A3AR or TMIGD3, respectively.**

(a, b) Representative images of western blotting for TMIGD3, A3AR,  $\beta$ -actin, and GAPDH in SJSA-1 (a) and Saos2 (b) cells downregulated for TMIGD3 (*T6U*) or A3AR (*A2a*).

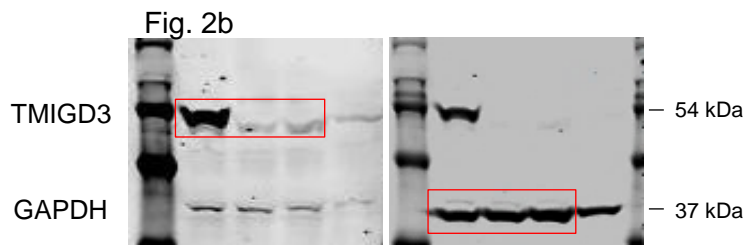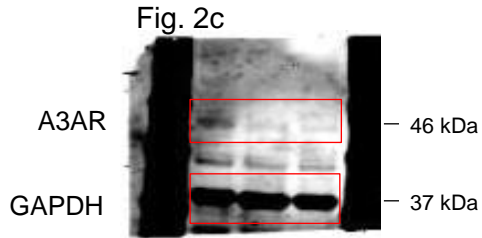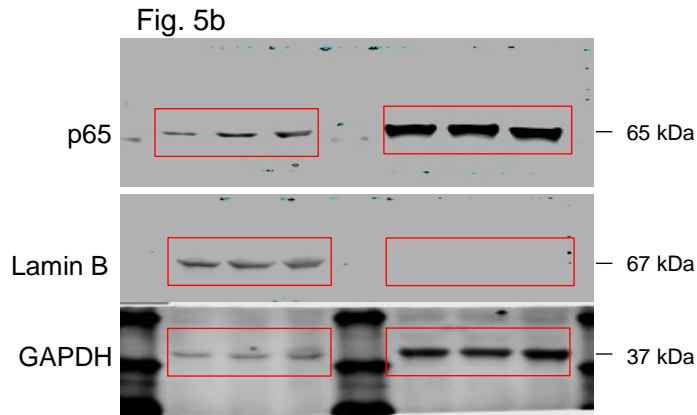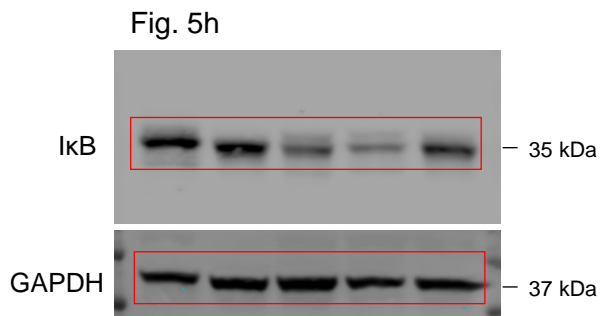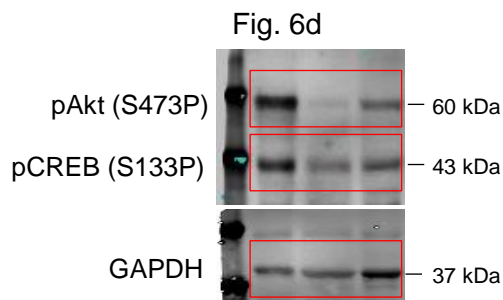

**Supplementary Figure 7 | Uncropped images of important western blotting presented in the main figures.**

Red boxes indicate the areas presented in the representative figures.

**Supplementary Table 1 | Sphere forming potential of OS cell lines**

| <b>Cell line</b> | <b>Total cell # examined</b> | <b>% sphere formation* (average +/- S.D.)<br/>30-75 <math>\mu\text{m}</math>, &gt;75 <math>\mu\text{m}</math></b> |
|------------------|------------------------------|-------------------------------------------------------------------------------------------------------------------|
| U2OS             | 140,000                      | 0+/-0, 0+/-0                                                                                                      |
| Saos2            | 140,000                      | 0+/-0, 0+/-0                                                                                                      |
| SJSA-1           | 140,000                      | 0.5+/-0.5, 0+/-0                                                                                                  |
| MG63             | 2,160                        | 7.7+/-1.5, 4.5+/-2.1                                                                                              |
| KHOS/NP          | 1,780                        | 9.2+/-2.1, 7.7+/-1.8                                                                                              |

Spheres < 30  $\mu\text{m}$  in diameter were not counted as spheres.

\* % sphere formation: a percentage of # of spheres formed/# of cells seeded.



**Supplementary Table 2 | Functions of candidates**

| <b>Gene name<br/>(abbreviation)</b>                           | <b>Function</b>                                                                                                                                                         |
|---------------------------------------------------------------|-------------------------------------------------------------------------------------------------------------------------------------------------------------------------|
| Transmembrane and immunoglobulin domain containing 3 (TMIGD3) | Unknown. Ig-like fold containing protein family. TMIGD3 i1 is an alternative splicing form of adenosine A3 receptor (A3AR), whereas TMIGD3 i3 has no overlap with A3AR. |
| Solute carrier family 45-4 (SLC45A4)                          | Unknown. No reference.                                                                                                                                                  |
| Spi-B (Spi-B)                                                 | Ets family transcription factor implicated in B cell lymphoma suppression.                                                                                              |
| Glutamate receptor interacting protein 1 (GRIP1)              | Cytoplasmic multi-PDZ scaffolding protein implicated in neuronal synaptic function.                                                                                     |
| Zinc finger RNA binding protein 2 (ZFR2)                      | Unknown. No reference.                                                                                                                                                  |
| Spermatogenesis and centriole associated 1 (SPATC1)           | Centrosomal protein implicated in zygotic cell division (Y chromosome).                                                                                                 |
| Periphilin-1 (PPHLN1)                                         | Gastric cancer antigen Ga50 involved in epithelial differentiation.                                                                                                     |
